# Supplementary material for: Within- and across-day patterns of interplay between depressive symptoms and related psychopathological processes: a dynamic network approach during the COVID-19 pandemic
Source: Springer Nature journal article supplement (doi:10.1186/s12916-021-02179-y), 2021-11-30

**Figure S2. Supplementary temporal network with all effects**

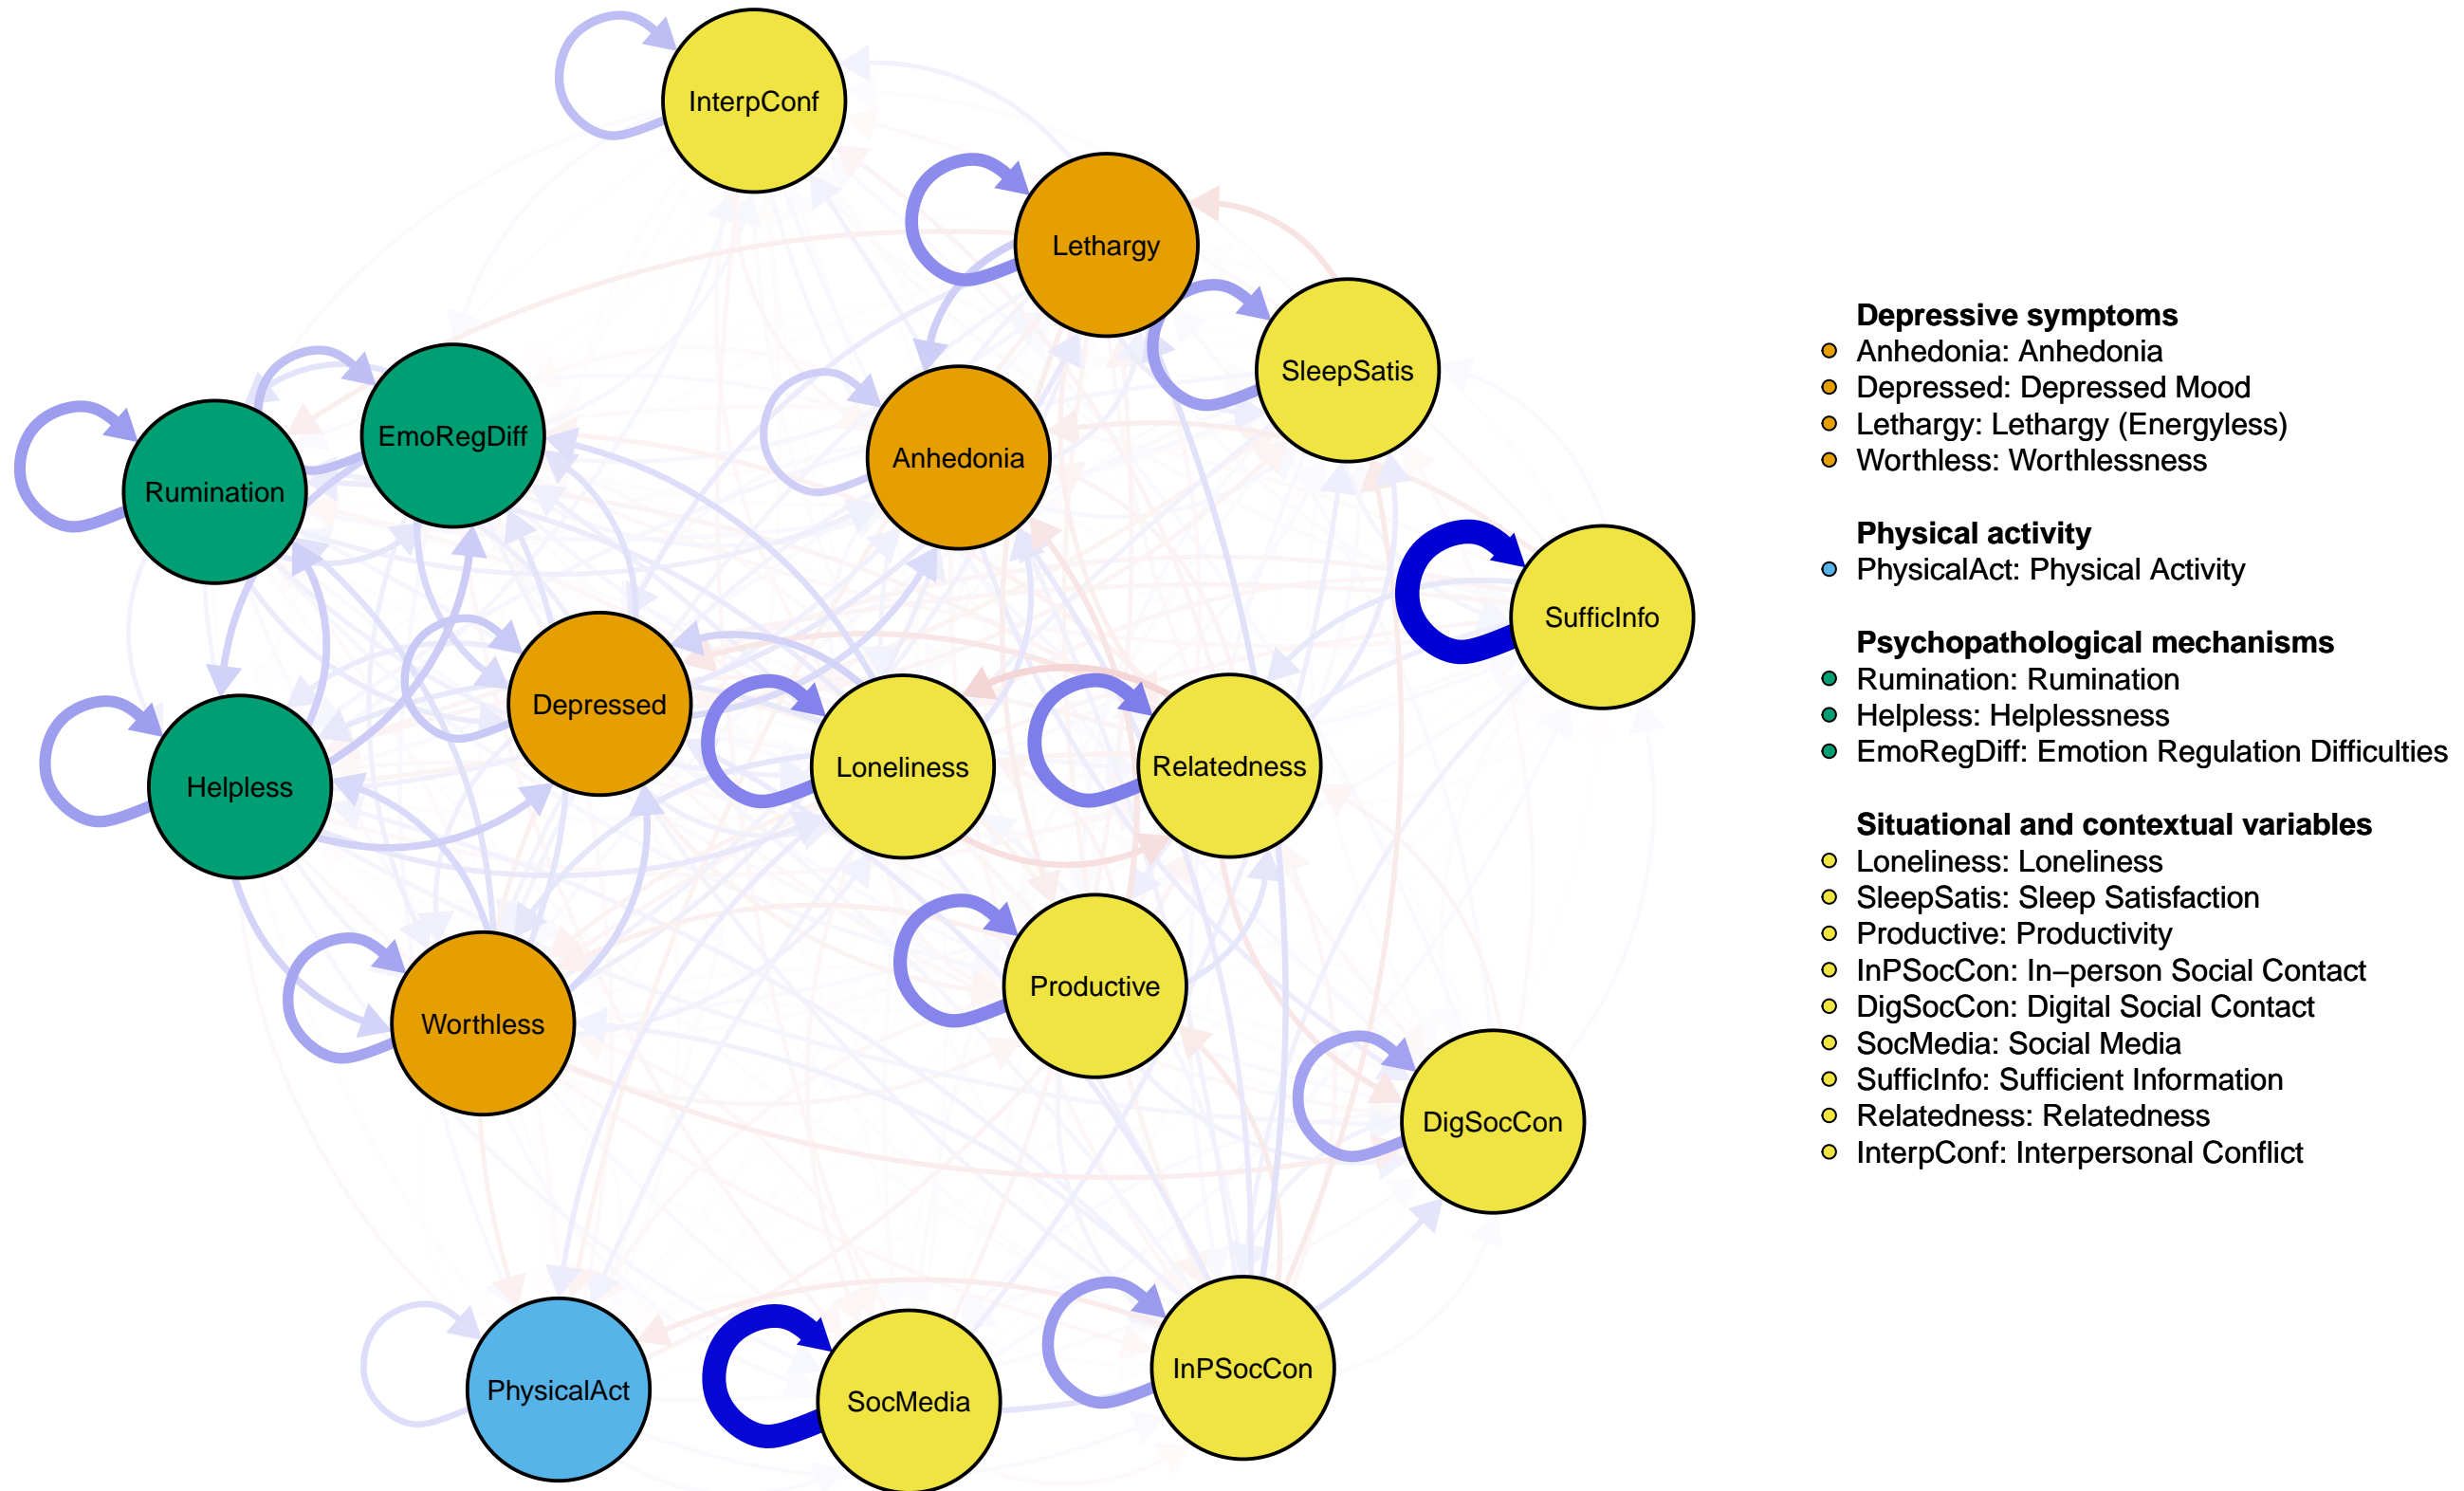

**Figure S3. Supplementary contemporaneous network with all effects**

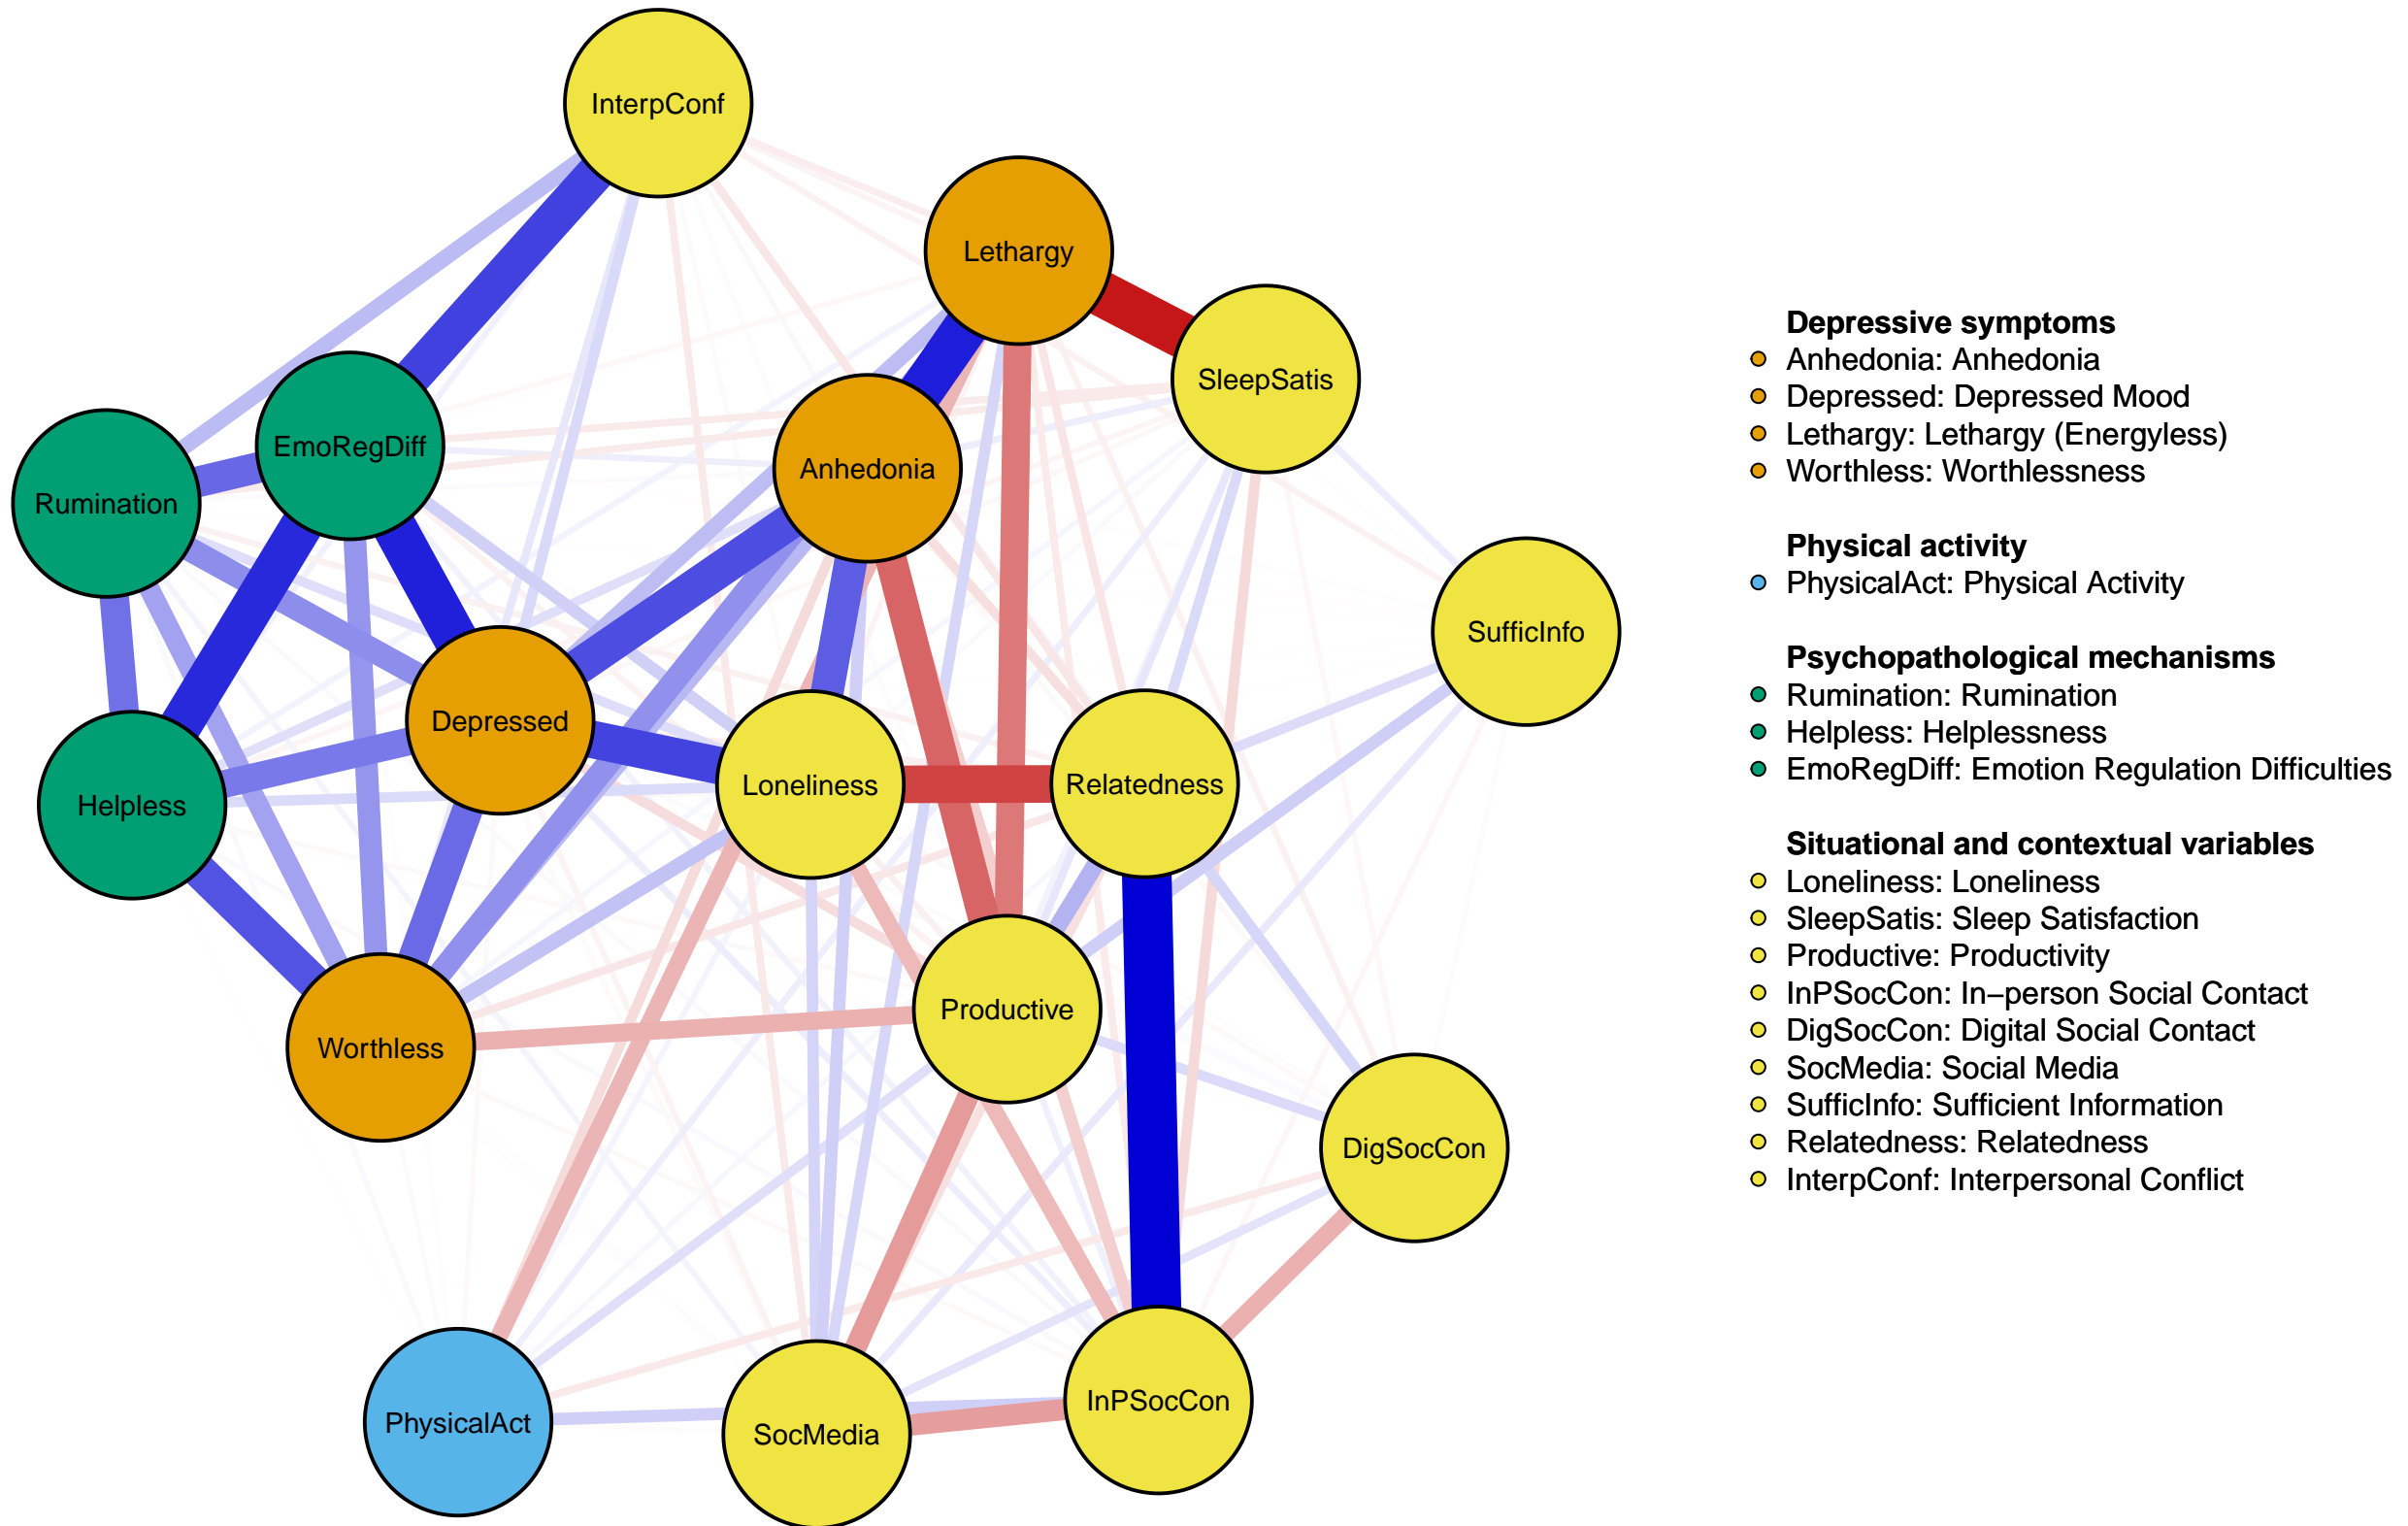

**Figure S4. Supplementary between-subjects network with all effects**

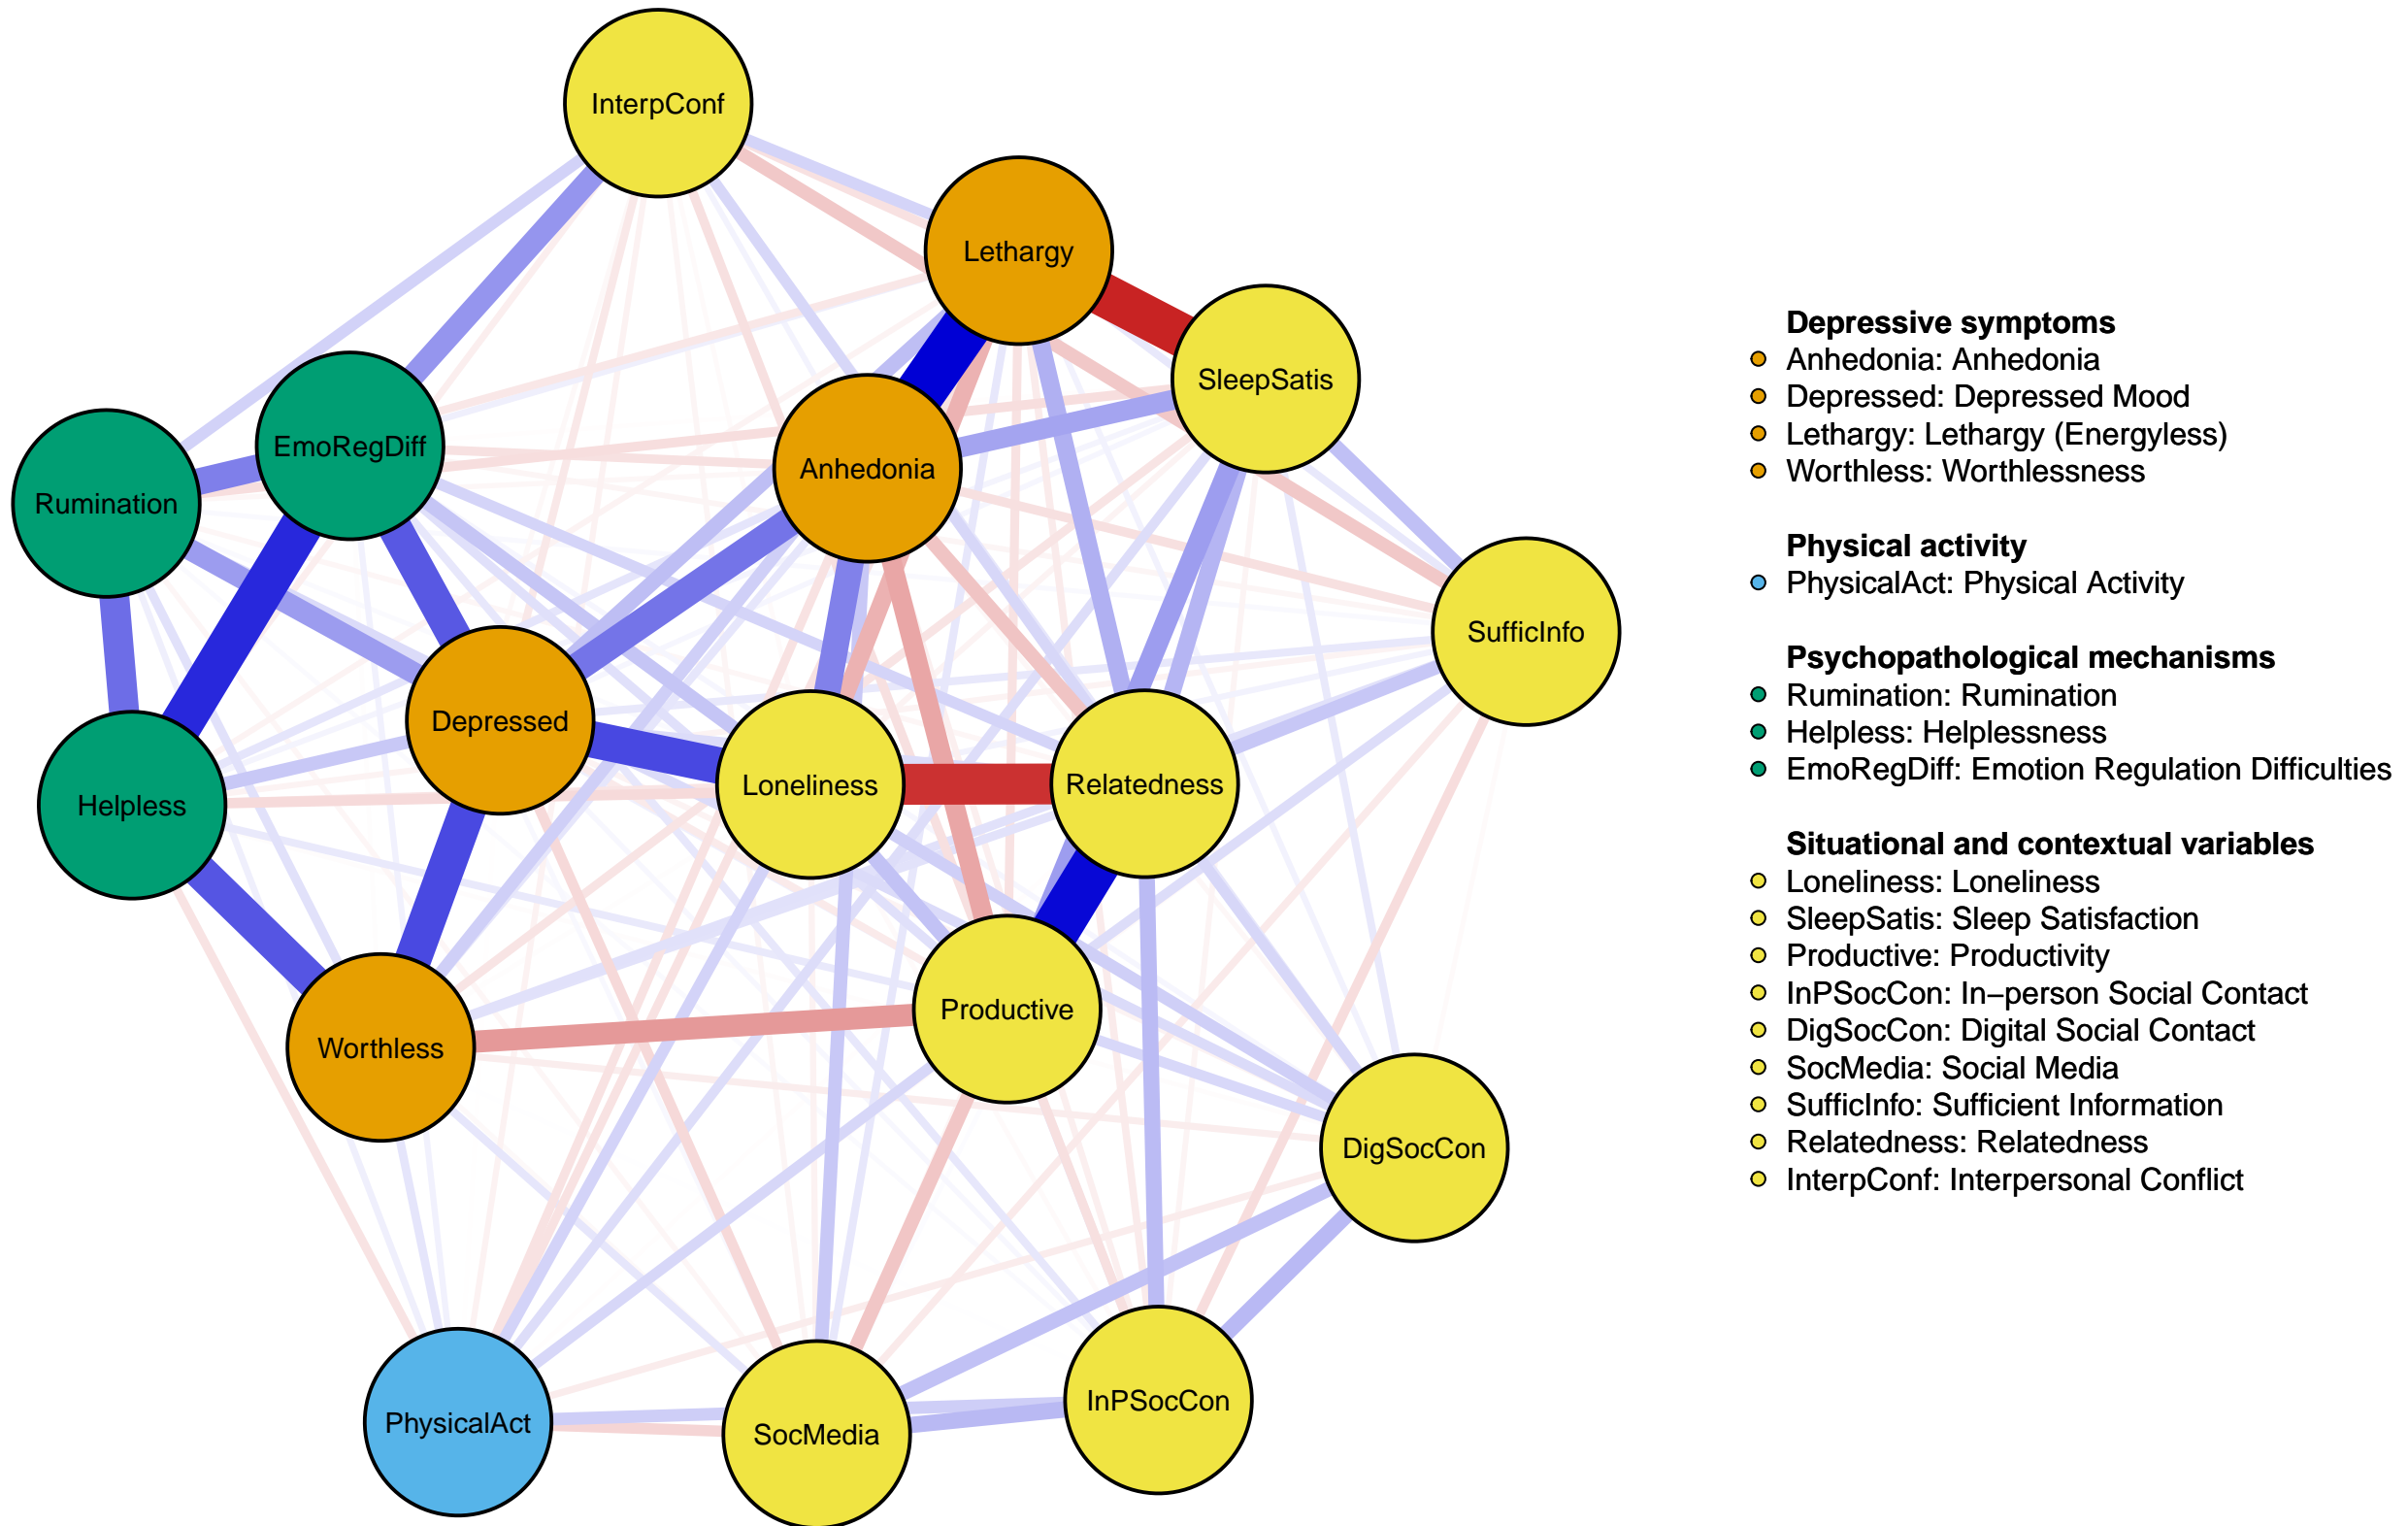

Supplement: MOESM2 [file 19915286]
