# Supplementary material for: Within- and across-day patterns of interplay between depressive symptoms and related psychopathological processes: a dynamic network approach during the COVID-19 pandemic
Source: BMC Med. 2021 Nov 30;19:317. doi: 10.1186/s12916-021-02179-y (PMC8629696; doi:10.1186/s12916-021-02179-y)
Supplement: Supplementary file 3 — Additional file 3 Table S1: Consistency amongst highly central nodes across replicability analyses. [file 12916_2021_2179_MOESM3_ESM.xlsx]

## Sheet: Sheet1
Table S1. Consistency amongst highly central nodes across replicability analyses
Main Analysis								Split-half Time-series Replicability Analysis 1										Random Split-half Replicability Analysis 1
OutStrength		InStrength		Contemporaneous		Between		OutStrength		InStrength		Contemporaneous		Between				OutStrength		InStrength		Contemporaneous		Between
Loneliness		Depressed mood		Depressed mood		Relatedness		Loneliness		Depressed mood		Depressed mood		Relatedness				Loneliness		Depressed mood		Depressed mood		Depressed mood
Helplessness		Anhedonia		Anhedonia		Depressed mood		Helplessness		Anhedonia		Anhedonia		Depressed mood				Helplessness		Anhedonia		Anhedonia		Anhedonia
In-person social contact		EmoRegDiff		EmoRegDiff		Anhedonia		In-person social contact		EmoRegDiff		EmoRegDiff | Lethargy		Anhedonia				In-person social contact		EmoRegDiff		EmoRegDiff | Lethargy		Loneliness
								Split-half Time-series Replicability Analysis 2										Random Split-half Replicability Analysis 2
								OutStrength		InStrength		Contemporaneous		Between				OutStrength		InStrength		Contemporaneous		Between
								Loneliness		Depressed mood		Depressed mood		Relatedness				Helplessness		Depressed mood		Depressed mood		Relatedness
								In-person social contact		Anhedonia		Anhedonia		Depressed mood				Worthless		Anhedonia		Anhedonia		Depressed mood
								Helplessness | Lethargy		EmoRegDiff		EmoRegDiff		Loneliness | Anhedonia				In-person social contact		EmoRegDiff		EmoRegDiff		Anhedonia
								Number of centrality indices consistent across all replicability analyses
														N	Percentage (%)
								Total number of central edges (Top 3) across five analyses						60	1
								Number of central edges uniquely consistent across five analyses						54	0.9
								Number of central edges consistent across five analyses						58	0.9667
Descriptive note:													Color code:
The vertical line ' | ' refers to cases where two nodes where equally ranked in centrality.													Green	Fully and uniquely replicated (i.e., the central node retrieved is identical as main analysis).
Uniquely consistent was defined as cases where the top 3 most central nodes where exactly the same across all analyses.													Yellow	Replicated (i.e., central node from main analysis is retrieved, but shares its position with an additional node).
													Red	Not replicated (i.e., central node from main analysis not retrieved, but another node obtained).
